# Supplementary material for: Patterns of pregabalin prescribing in four German federal states: analysis of routine data to investigate potential misuse of pregabalin
Source: PubMed Central journal article supplement — BMJ Open. 2022 Jul 25;12(7):e060104. doi: 10.1136/bmjopen-2021-060104 (PMC9328100; doi:10.1136/bmjopen-2021-060104), 2022-07-25
Supplement: bmjopen-2021-060104supp001.pdf [file bmjopen-2021-060104supp001.pdf]

**Supplemental material 1**

List of drugs for inclusion of patients in the extended population

| ATC     | Name                                           |
|---------|------------------------------------------------|
| N06AX22 | Agomelatin, Valdoxan                           |
| B01AF02 | Apixaban, Eliquis                              |
| B01AE07 | Dabigatran, Pradaxa                            |
| A10BK01 | Dapagliflozin, Forxiga                         |
| A10BJ05 | Dulaglutid, Trulicity                          |
| B01AF03 | Edoxaban, Lixiana                              |
| C03DA04 | Eplerenon, Inspra                              |
| M04AA03 | Febuxostat, Adenuric                           |
| C01EB17 | Ivabradin, Procoralan                          |
| N06BA12 | Lisdexamfetamin, Elvanse                       |
| N03AX16 | Pregabalin, Lyrica                             |
| B01AF01 | Rivaroxaban, Xarelto                           |
| C09DX04 | Sacubitril/Valsartan, Entresto                 |
| A10BH03 | Saxagliptin, Onglyza                           |
| A10BH01 | Sitagliptin, Januvia                           |
| N02AX06 | Tapentadol, Palexia                            |
| B01AC24 | Ticragelor, Brillique                          |
| C10BA02 | Ezetimib/Simvastatin, Inegy                    |
| N02AA55 | Oxycodon/Naloxon, Targin                       |
| M05BX04 | Denosumab, Prolia                              |
| N06AX21 | Duloxetine, Cymbalta                           |
| A10BK02 | Canagliflozin, Invokana                        |
| A10BK03 | Empagliflozin, Jardiance                       |
| L04AB01 | Etanercept, Enbrel                             |
| N06BA09 | Atomoxetine, Strattera                         |
| N07XX09 | Dimethylfumarat, Tecfidera                     |
| C01BD07 | Dronedaron, Multaq                             |
| R03AC18 | Indacaterol/Glycopyrronium, Ultibro Breezhaler |
| A10BJ02 | Liraglutid, Victoza                            |
| B01AC22 | Prasugrel, Efient                              |
| A10AE04 | Insulin glargin, Toujeo                        |
| R03AL06 | Tiotropium/Olodaterol, Spiolto                 |
| R03AL03 | Umeclidinium/Vilanterol, Anoro                 |
| G04BD08 | Solifenacin, Vesikur                           |

**Notes:** This list was developed within the WirtMed study and comprises drugs with a high price and/or unsure or unproved medical benefit for patients.
