# Supplementary material for: Patterns of pregabalin prescribing in four German federal states: analysis of routine data to investigate potential misuse of pregabalin
Source: PubMed Central journal article supplement — BMJ Open. 2022 Jul 25;12(7):e060104. doi: 10.1136/bmjopen-2021-060104 (PMC9328100; doi:10.1136/bmjopen-2021-060104), 2022-07-25
Supplement: bmjopen-2021-060104supp002.pdf [file bmjopen-2021-060104supp002.pdf]

## Supplemental material 2

|                                                             |                                                 | Groups of patients with average doses |                |                | Patients with >600mg/day |                                |
|-------------------------------------------------------------|-------------------------------------------------|---------------------------------------|----------------|----------------|--------------------------|--------------------------------|
|                                                             |                                                 | All patients prescribed pregabalin    | ≤600mg/day     | >600mg/day     | One provider (practice)  | Multiple providers (practices) |
|                                                             |                                                 | N (%) / M (SD)                        | N (%) / M (SD) | N (%) / M (SD) | N (%) / M (SD)           | N (%) / M (SD)                 |
| <b>Number of patients per group</b>                         |                                                 | <b>53,049</b>                         | <b>52,172</b>  | <b>877</b>     | <b>295</b>               | <b>582</b>                     |
| <b>Patient characteristics</b>                              |                                                 |                                       |                |                |                          |                                |
| <b>Gender</b>                                               | Male                                            | 21,004 (39.6)                         | 20,468 (39.2)  | 536 (61.1)     | 190 (64.4)               | 346 (59.5)                     |
|                                                             | Female                                          | 32,045 (60.4)                         | 31,704 (60.8)  | 341 (38.9)     | 105 (35.6)               | 236 (40.5)                     |
| <b>Age (years)</b>                                          | 12–17                                           | 22 (0.0)                              | 22 (0.0)       | 0 (0.0)        | 0 (0.0)                  | 0 (0.0)                        |
|                                                             | 18–29                                           | 867 (1.6)                             | 782 (1.5)      | 85 (9.7)       | 26 (8.8)                 | 59 (10.1)                      |
|                                                             | 30–39                                           | 1,996 (3.8)                           | 1,808 (3.5)    | 188 (21.4)     | 40 (13.6)                | 148 (25.4)                     |
|                                                             | 40–49                                           | 4,472 (8.4)                           | 4,271 (8.2)    | 201 (22.9)     | 56 (19.0)                | 145 (24.9)                     |
|                                                             | 50–59                                           | 9,434 (17.8)                          | 9,252 (17.7)   | 182 (20.8)     | 71 (24.1)                | 111 (19.1)                     |
|                                                             | 60–69                                           | 9,768 (18.4)                          | 9,677 (18.5)   | 91 (10.4)      | 47 (15.9)                | 44 (7.6)                       |
|                                                             | ≥ 70                                            | 26,490 (49.9)                         | 26,360 (50.5)  | 130 (14.8)     | 55 (18.6)                | 75 (12.9)                      |
| <b>Place of residence</b>                                   | Urban area                                      | 23,862 (45.0)                         | 23,413 (44.9)  | 449 (51.2)     | 137 (46.4)               | 312 (53.6)                     |
|                                                             | Rural area                                      | 29,119 (54.9)                         | 28,694 (55.0)  | 425 (48.5)     | 157 (53.2)               | 268 (46.0)                     |
| <b>Approved indications</b>                                 |                                                 |                                       |                |                |                          |                                |
|                                                             | Epilepsy                                        | 1,968 (3.7)                           | 1,882 (3.6)    | 86 (9.8)       | 18 (6.1)                 | 68 (11.7)                      |
|                                                             | Generalised anxiety disorder                    | 3,068 (5.8)                           | 2,958 (5.7)    | 110 (12.5)     | 25 (8.5)                 | 85 (14.6)                      |
|                                                             | Neuropathic pain                                | 39,829 (75.1)                         | 39,249 (75.2)  | 580 (66.1)     | 184 (62.4)               | 396 (68.0)                     |
|                                                             | Neuropathic pain (broad definition)             | 42,120 (79.4)                         | 41,505 (79.6)  | 615 (70.1)     | 203 (68.8)               | 412 (70.8)                     |
|                                                             | Multiple                                        | 3,293 (6.2)                           | 3,186 (6.1)    | 107 (12.2)     | 21 (7.1)                 | 86 (14.8)                      |
|                                                             | None of the indications recorded in the records | 9,283 (17.5)                          | 9,098 (17.4)   | 185 (21.1)     | 71 (24.1)                | 114 (19.6)                     |
| <b>Medical pre-conditions with increased risk of abuse</b>  |                                                 |                                       |                |                |                          |                                |
|                                                             | Substance use disorders                         | 6,414 (12.1)                          | 6,049 (11.6)   | 365 (41.6)     | 104 (35.3)               | 261 (44.8)                     |
|                                                             | Addictive disorder drug (alcohol)               | 43 (0.1)                              | 41 (0.1)       | 2 (0.2)        | 0 (0.0)                  | 2 (0.3)                        |
|                                                             | Addictive disorder drug (tobacco)               | 2 (0.0)                               | 2 (0.0)        | 0 (0.0)        | 0 (0.0)                  | 0 (0.0)                        |
|                                                             | Addictive disorder drug (opioids)               | 258 (0.5)                             | 182 (0.3)      | 76 (8.7)       | 16 (5.4)                 | 60 (10.3)                      |
| <b>Drugs with potential for abuse</b>                       |                                                 |                                       |                |                |                          |                                |
|                                                             | Benzodiazepine                                  | 9,665 (18.2)                          | 9,367 (18.0)   | 298 (34.0)     | 69 (23.4)                | 229 (39.3)                     |
|                                                             | Opioids                                         | 23,886 (45.0)                         | 23,527 (45.1)  | 359 (40.9)     | 108 (36.6)               | 251 (43.1)                     |
|                                                             | Psychostimulants                                | 288 (0.5)                             | 263 (0.5)      | 25 (2.9)       | 9 (3.1)                  | 16 (2.7)                       |
| <b>Contemporaneous prescription of gabapentin</b>           |                                                 | 2,973 (5.6)                           | 2,890 (5.5)    | 83 (9.5)       | 25 (8.5)                 | 58 (10.0)                      |
| <b>Prescription networks and structural characteristics</b> |                                                 |                                       |                |                |                          |                                |
|                                                             | Number of prescriptions                         | 6.34 (3.28)                           | 6.23 (2.91)    | 12.70 (10.17)  | 8.76 (5.46)              | 14.69 (11.35)                  |
|                                                             | Number of prescribers (physicians)              | 1.79 (1.03)                           | 1.77 (0.89)    | 3.12 (3.91)    | -                        | -                              |
|                                                             | Number of prescribers (practices)               | 1.59 (0.87)                           | 1.57 (0.73)    | 2.86 (3.61)    | -                        | -                              |
| <b>Medical speciality of initial prescriber</b>             |                                                 |                                       |                |                |                          |                                |
|                                                             | GP                                              | 32,911 (62.0)                         | 32,344 (62.0)  | 567 (64.7)     | 204 (69.2)               | 363 (62.4)                     |
|                                                             | Anaesthesiology                                 | 1,935 (3.6)                           | 1,908 (3.7)    | 27 (3.1)       | 11 (3.7)                 | 16 (2.7)                       |
|                                                             | Orthopaedics                                    | 1,209 (2.3)                           | 1,192 (2.3)    | 17 (1.9)       | 2 (0.7)                  | 15 (2.6)                       |
|                                                             | Neuroscience                                    | 4,292 (8.1)                           | 4,223 (8.1)    | 69 (7.9)       | 20 (6.8)                 | 49 (8.4)                       |
|                                                             | Neurology                                       | 5,039 (9.5)                           | 4,984 (9.6)    | 55 (6.3)       | 26 (8.8)                 | 29 (5.0)                       |
|                                                             | Psychiatry and psychotherapy                    | 2,341 (4.4)                           | 2,289 (4.4)    | 52 (5.9)       | 18 (6.1)                 | 34 (5.8)                       |
|                                                             | Other                                           | 5,322 (10.0)                          | 5,232 (10.0)   | 90 (10.3)      | 14 (4.7)                 | 76 (13.1)                      |
|                                                             | Proportion of specialists among prescribers     | 0.31 (0.40)                           | 0.31 (0.40)    | 0.31 (0.38)    | 0.30 (0.46)              | 0.31 (0.34)                    |
|                                                             | Care density among physicians <sup>1</sup>      | 47.97 (70.61)                         | 48.29 (70.67)  | 33.23 (66.43)  | -                        | -                              |
|                                                             | Care density among practices <sup>1</sup>       | 17.42 (35.77)                         | 17.54 (35.84)  | 12.90 (32.76)  | -                        | -                              |
|                                                             | Maximal geographic distance [in kilometres]     | 6.86 (26.63)                          | 6.71 (26.24)   | 15.98 (43.27)  | -                        | -                              |
